# Supplementary material
Source: PubMed Central journal article supplement (PMC3486046)
Supplement: IAI.00672-12_zii999099870so1.pdf [file IAI.00672-12_zii999099870so1.pdf]

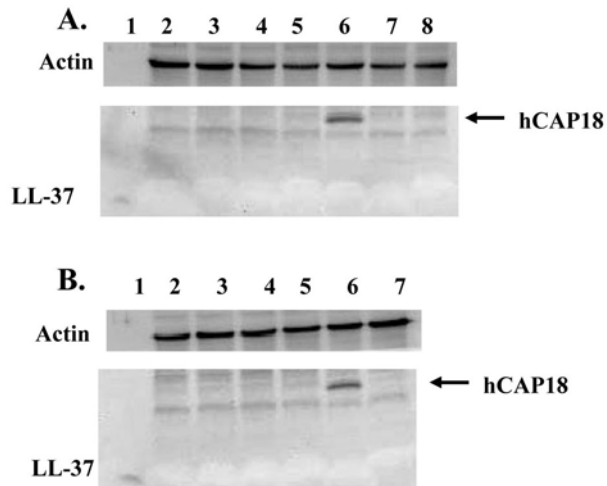

Fig. S1. Western blot analysis of crude protein from *S. Typhi*-infected and LPS-stimulated MDMs. MDM were infected with WT,  $\Delta pmrAB$ , or  $\Delta pmrF$  *S. Typhi* for 2.5 (A.) or 10 (B.) hours. Lane 1 represents 5 ng purified LL-37, Lane 2 is from MDMs infected with WT *S. Typhi*, Lane 3 is from  $\Delta pmrAB$  infected MDMs, Lane 4 is from  $\Delta pmrF$  infected MDMs, Lane 5 is from uninfected MDMs, Lane 6 is from MDMs treated with 1,25D3 for 24 hrs, Lane 7 is from untreated MDMs, and Lane 8 is from MDMs exposed to 100 ng of WT *S. Typhi* LPS for 1 hr [MDMs exposed to 100 ng LPS for 24 hrs showed same response (data not shown)]. All lanes were loaded with 30  $\mu$ g crude protein.
